# Supplementary material for: A near infrared fluorescent dye for trivalent ions sensing and working as a molecular keypad lock
Source: Royal Society of Chemistry journal article supplement (doi:10.1039/c3ra47635a), 2014-01-01
Supplement: c3ra47635a1.pdf [file c3ra47635a1.pdf]

## Supporting Information for

# A near infrared fluorescent dye for trivalent ions sensing and working as a molecular keypad lock

Yongqian Xu,<sup>\*a</sup> Dan Zhang,<sup>a</sup> Benhao Li,<sup>a</sup> Yunfei Zhang,<sup>a</sup> Shiguo Sun<sup>\*a</sup> and Yi Pang<sup>b</sup>

<sup>a</sup> College of Science, Northwest A&F University, Yangling, Shaanxi, P.R. China, 712100, xuyq@nwsuaf.edu.cn

<sup>b</sup> Department of Chemistry & Maurice Morton Institute of Polymer Science, The University of Akron, Akron, OH, 44325

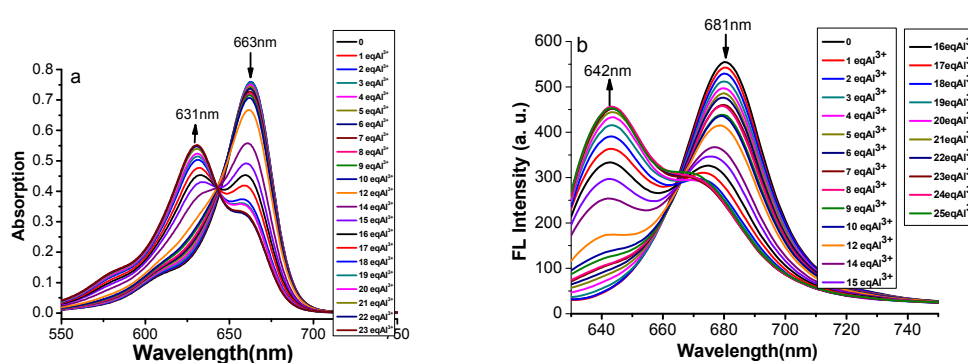

**Fig. S1** UV-Vis (a) and fluorescence (b) spectra of probe DNSA-SQ (5 μM) upon addition of AlCl<sub>3</sub> in CH<sub>3</sub>CN ( $\lambda_{\text{ex}} = 620 \text{ nm}$ ).

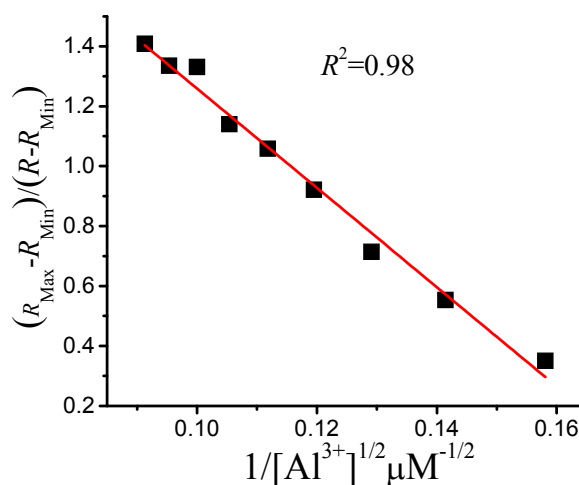

**Fig. S2** The Benesi-Hildebrand plot shows a 2:1 stoichiometry for a complexation between DNSA-SQ (5 μM) and Al<sup>3+</sup> in CH<sub>3</sub>CN solution, where  $R = I_{645} / I_{681}$ .

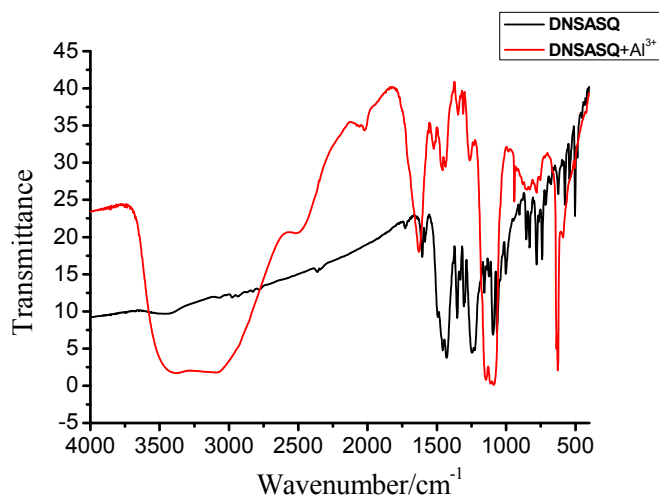

**Fig. S3** IR spectrum of **DNSA-SQ** and **DNSA-SQ+Al(ClO<sub>4</sub>)<sub>3</sub>**.  
The IR spectrum change of **DNSA-SQ** before and after addition of **Al(ClO<sub>4</sub>)<sub>3</sub>** indicates that the new species has formed between **DNSA-SQ** and **Al(ClO<sub>4</sub>)<sub>3</sub>**.

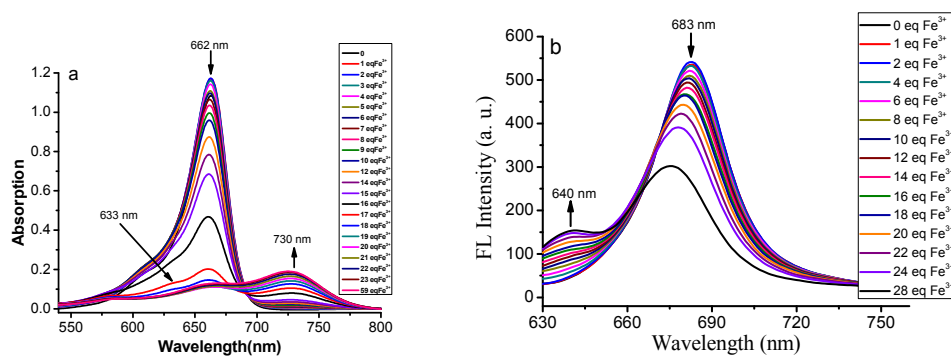

**Fig. S4** UV-Vis (a) and fluorescence (b) spectra of probe **DNSA-SQ** (5  $\mu\text{M}$ ) upon addition of **FeCl<sub>3</sub>** in **CH<sub>3</sub>CN** ( $\lambda_{\text{ex}} = 620 \text{ nm}$ ).

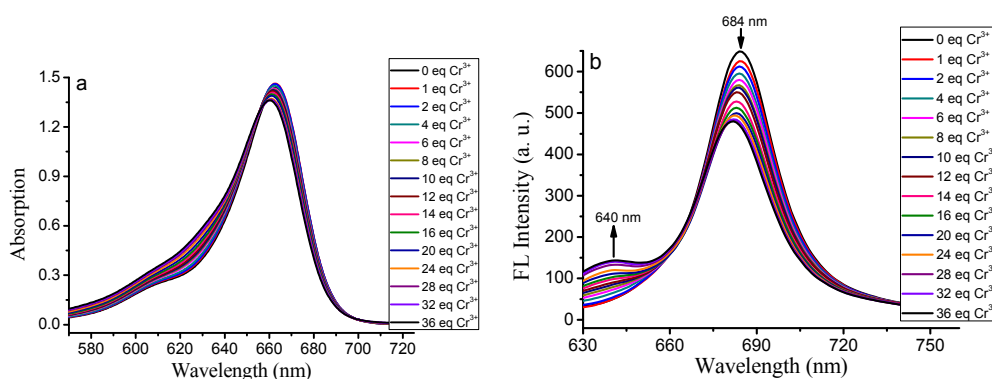

**Fig. S5** UV-Vis (a) and fluorescence (b) spectra of probe **DNSA-SQ** (5  $\mu\text{M}$ ) upon addition of **CrCl<sub>3</sub>** in **CH<sub>3</sub>CN** ( $\lambda_{\text{ex}} = 620 \text{ nm}$ ).

ZYF-20-1 #39-49 RT: 0.25-0.29 AV: 11 NL: 4.07E3  
T: ITMS + c ESI sid=35.00 Full ms [50.00-2000.00]

 DNS

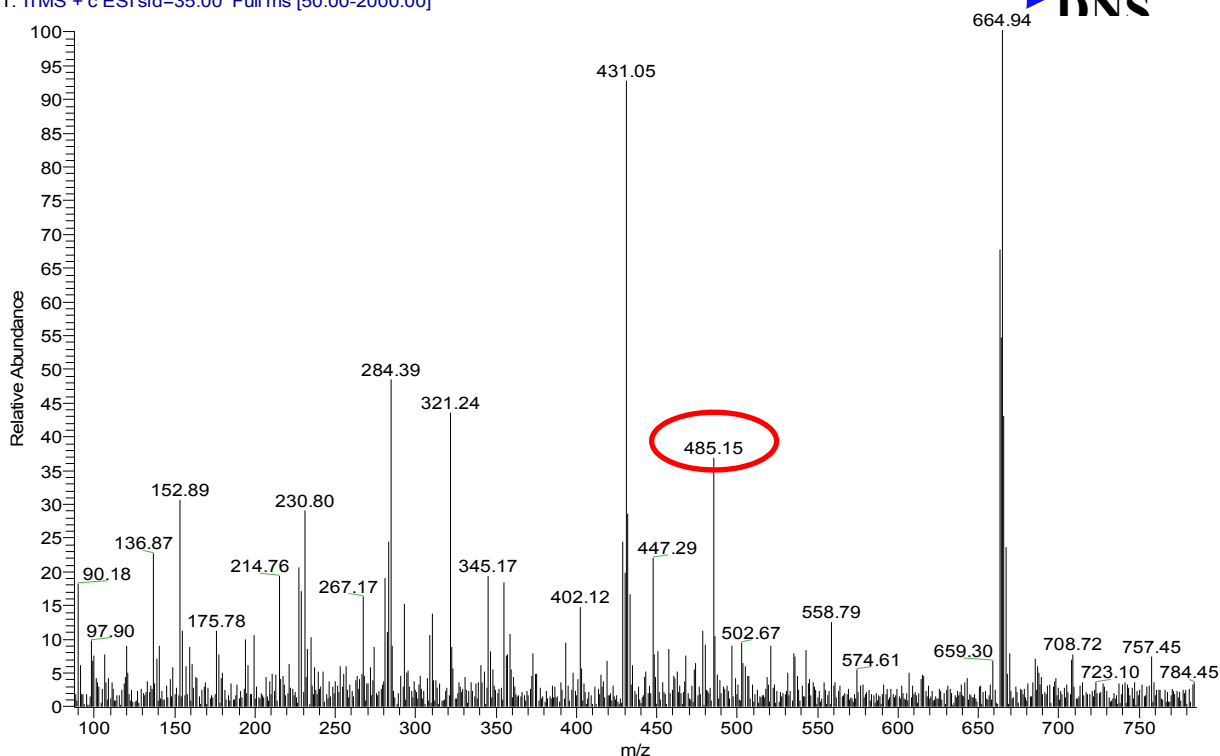

Fig. S6 Mass spectra of probe **DNSA-SQ** upon addition of  $\text{AlCl}_3$  in  $\text{CH}_3\text{CN}$ .

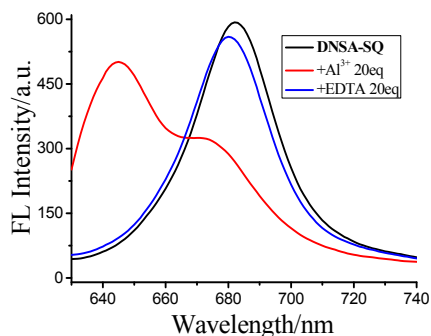

Fig. S7 Fluorescence spectra of probe **DNSA-SQ** ( $5 \mu\text{M}$ ) upon addition of 20 equivalents of  $\text{Al}^{3+}$ , followed by addition of 20 equivalents of EDTA in  $\text{CH}_3\text{CN}$  ( $\lambda_{\text{ex}} = 620 \text{ nm}$ ).

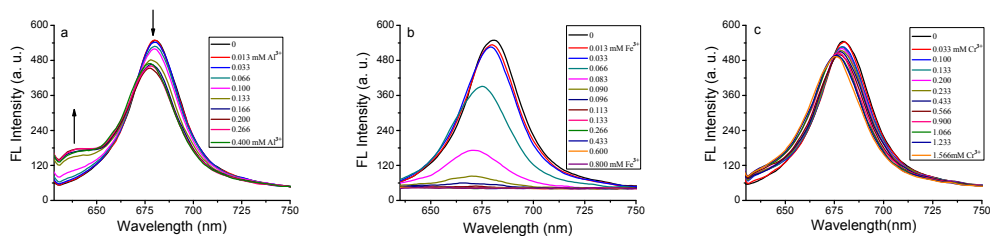

Fig. S8 Fluorescence spectra of probe **DNSA-SQ** ( $5 \mu\text{M}$ ) upon addition of different trivalent metal ions (a:  $\text{Al}^{3+}$ ; b:  $\text{Fe}^{3+}$ ; c:  $\text{Cr}^{3+}$ ) in aqueous  $\text{CH}_3\text{CN}$  (5/95, V/V) ( $\lambda_{\text{ex}} = 620 \text{ nm}$ ).

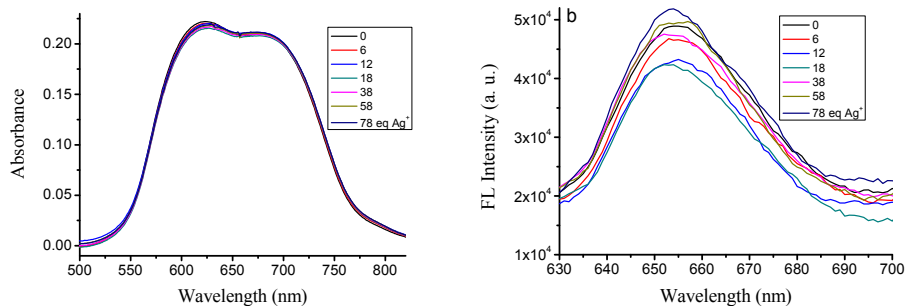

**Fig. S9** Absorption and fluorescence spectra of **DNSA-SQ** ( $5 \mu\text{M}$ ) in aqueous solution upon addition of different concentration of  $\text{Ag}^+$  in the absence of BSA.

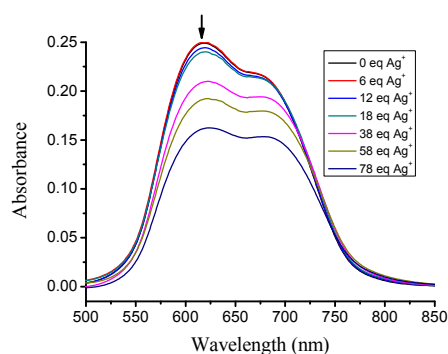

**Fig. S10** Absorption spectra of **DNSA-SQ** ( $5 \mu\text{M}$ ) in aqueous solution to different concentration of  $\text{Ag}^+$  in the presence of 1 eq of BSA.

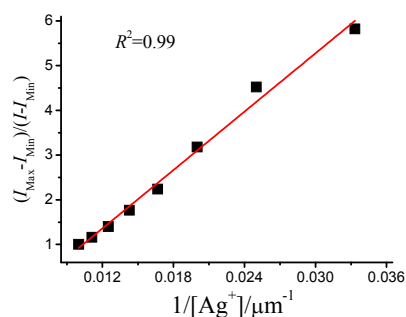

**Fig. S11** The Benesi-Hildebrand plot shows a 1:1 stoichiometry for a complexation between **DNSA-SQ+BSA** ( $5 \mu\text{M}$ ) and  $\text{Ag}^+$  in buffer solution (10 mM PBS, pH=7.4).

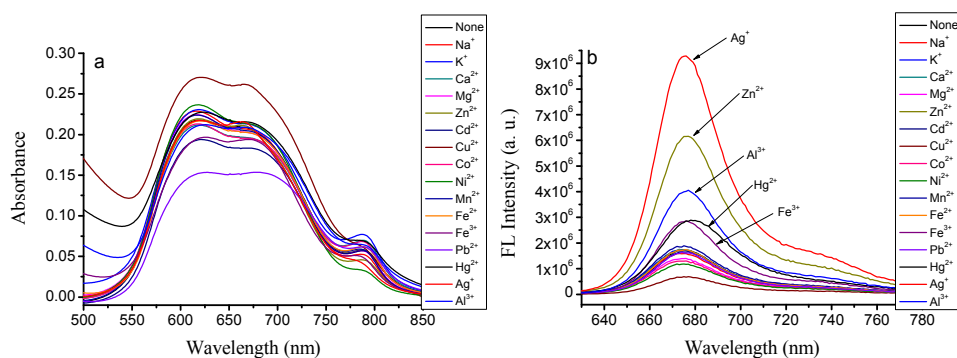

**Fig. S12** Absorption (a) and fluorescence (b) spectra of **DNSA-SQ** ( $5 \mu\text{M}$ ) in aqueous solution upon addition of different metal ions in the presence of 1 eq of BSA.

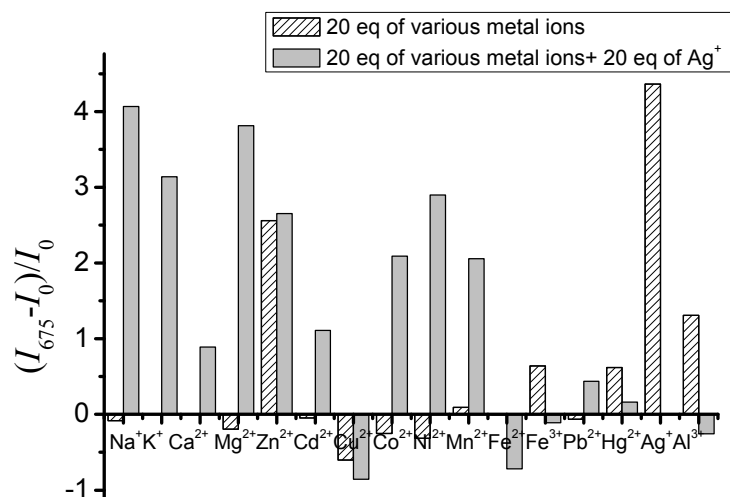

**Fig. S13** Relative fluorescence intensity ( $I_{675}-I_0/I_0$ ) change of **DNSA-SQ** ( $5 \mu\text{M}$ ) upon addition of 20 equivalent of various metal ions in the presence of 1 equivalent of BSA and with  $\text{Ag}^+$  or without  $\text{Ag}^+$  in aqueous solution, where  $I_0$  and  $I_{675}$  indicate the fluorescence intensity of **DNSA-SQ** at 675 nm in the absence and presence of 20 equivalent of various metal ions respectively.

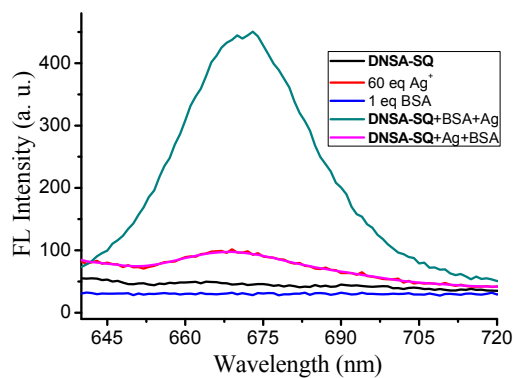

**Fig. S14** The fluorescence spectra response of **DNSA-SQ** ( $5 \mu\text{M}$ ) upon addition  $\text{Ag}^+$  ( $300 \mu\text{M}$ ) or BSA ( $5 \mu\text{M}$ ) or their mixtures in phosphate buffer solution ( $10 \text{ mM PBS}$ ,  $\text{pH}=7.4$ ).
